# Supplementary material
Source: PubMed Central journal article supplement (PMC6925624)
Supplement: NIHMS1538845-supplement-4.pdf [file NIHMS1538845-supplement-4.pdf]

**Supplemental Table 1. Exclusion criteria for establishing the robust cognitive internal normative sample in SOL-INCA.**

|                                                                                   | <b>n</b> | <b>Excluded</b> |
|-----------------------------------------------------------------------------------|----------|-----------------|
| Criteria 1 (C1): SOL-INCA                                                         | 6,377    |                 |
| C2: SOL-INCA with Neurocognitive Test at Baseline and age 45+ at Visit 1          | 6,354    | 23              |
| C3: C2 + no stroke at V1 or V2                                                    | 6,057    | 297             |
| C4: C3 + no brain cancer or tumor at baseline or Visit 2                          | 6,029    | 28              |
| C5: C4 + no significant depressive symptoms (CESD-10 cut-point of 20) at Visit 2  | 5,680    | 349             |
| C6: C5 + no missing Visit 1 education                                             | 5,664    | 16              |
| C7: C6 + no evidence of cognitive issues based on the Six-Item-Screener at Visit2 | 5,558    | 106             |
| C8: C7 + no self-reported MCI or dementia at Visit 2                              | 5,485    | 73              |
| C9: C8 + no use of anti-AD medication                                             | 5,451    | 34              |
| C10: C9 + not APOE 44 carrier                                                     | 5,395    | 56              |

CESD=Center for Epidemiologic Studies Depression Scale; MCI=Mild Cognitive Impairment; AD=Alzheimer Disease.

**Supplemental Table 2.** Cardiovascular disease measures of interest to SOL-INCA.

---

**Waist circumference**  
**Alcohol Consumption**  
**Smoking Status**  
**Physical Exercise**  
**Systolic Blood Pressure**  
**Diastolic Blood Pressure**  
**Peripheral Artery Disease**  
**Fasting glucose**  
**High Density Lipoprotein**  
**Total cholesterol**  
**GVRs<sup>1</sup>**  
**FCRS<sup>2</sup>**

---

**Note:** The GVRs is the Global Vascular Risk Score as generated by Sacco et al (2009)<sup>1</sup> in the multiethnic NOMAS cohort. The FCRS is the Framingham Cardiovascular Risk Score (see D'Agostino et al, 2008)<sup>2</sup>

## REFERENCES

1. Sacco RL, Khatri M, Rundek T, et al. Improving Global Vascular Risk Prediction With Behavioral and Anthropometric Factors: The Multiethnic NOMAS (Northern Manhattan Cohort Study). *Journal of the American College of Cardiology*. 2009;54(24):2303-2311.
2. D'agostino RB, Vasan RS, Pencina MJ, et al. General cardiovascular risk profile for use in primary care. *Circulation*. 2008;117(6):743-753.
